# Supplementary material for: Modulation of intestinal microbiota, morphology and mucin composition by dietary insect meal inclusion in free-range chickens
Source: BMC Vet Res. 2018 Dec 4;14:383. doi: 10.1186/s12917-018-1690-y (PMC6278000; doi:10.1186/s12917-018-1690-y)
Supplement: Supplementary file 1 — Good’s coverage and α-diversity measures of cecal microbiota of free-range chickens fed with control (C) and 7.5% inclusion level of Tenebrio molitor meal (TM7.5) diets. Description column indicates the 5 replicate pens of control (C_1, C_2, C_3, C_4 and C_5) and 7.5% inclusion level of Tenebrio molitor meal (TM7.5_1, TM7.5_2, TM7.5_3, TM7.5_4 and TM7.5_5) dietary treatments. (XLSX 9 kb) [file 12917_2018_1690_MOESM1_ESM.xlsx]

## Sheet: Alpha and Beta diversity
Diet	Description	Goods_coverage (%)	PD_whole_tree	Chao1	Observed_species	Shannon
TM7.5	TM7.5_1	84.6667	54.1579	1745.94	750	7.91122
TM7.5	TM7.5_2	80.3	58.5577	2254.07	892	7.811
TM7.5	TM7.5_3	82.4333	59.6837	2072.66	824	8.15694
TM7.5	TM7.5_4	81.3333	56.8602	2360	855	8.08689
TM7.5	TM7.5_5	83.3	55.1802	1749.86	801	7.61926
C	C_1	83.2	52.5714	1832.98	794	7.39978
C	C_2	89.4	39.4472	1272.22	531	6.74433
C	C_3	84.2	49.6311	2263.96	707	7.23584
C	C_4	85.7667	43.6597	1600.64	663	7.19766
C	C_5	83	54.4077	2058.95	761	7.02783
